# Supplementary material
Source: PubMed Central journal article supplement (PMC2848731)
Supplement: supp_108.067926_biolreprod.108.067926-1.pdf [file supp_108.067926_biolreprod.108.067926-1.pdf]

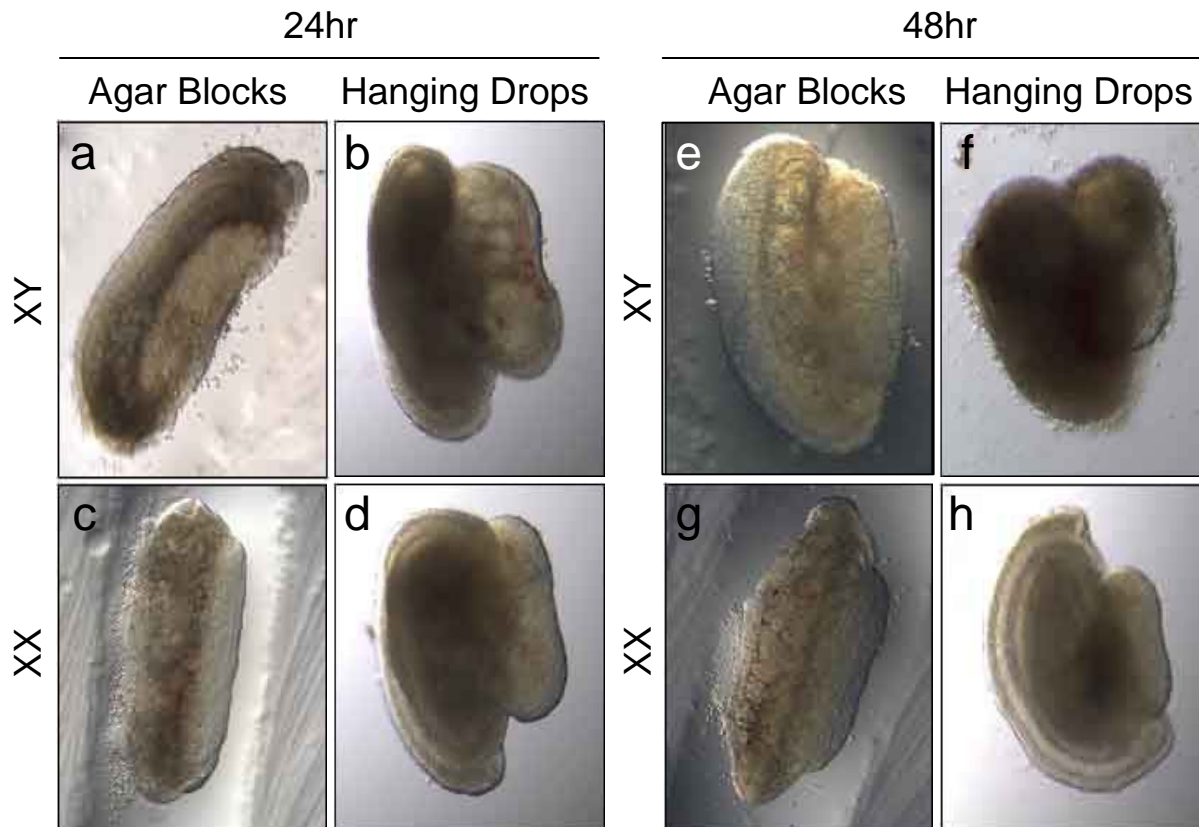

Szczepny et al., Supplemental Figure 1. Agar mould vs hanging drop cultured gonads. Comparison of male and female urogenital ridges incubated for 24 (a-d) and 48 (e-h) h in agar blocks and hanging drops. All photographs were taken at 200x magnification.
